# Supplementary material for: Conversion of h-BN into c-BN for tuning optoelectronic properties
Source: Royal Society of Chemistry journal article supplement (doi:10.1039/d0ma00008f), 2020-01-01
Supplement: d0ma00008f1.pdf [file d0ma00008f1.pdf]

## **Conversion of h-BN into c-BN for tuning optoelectronic properties**

*Ariful Haque and Jagdish Narayan*

Materials Science and Engineering, North Carolina State University, Raleigh, North Carolina  
27695.7916, USA

The CCDC deposition numbers for h-BN and c-BN are 1603140 and 1603055, respectively.
